# Supplementary material
Source: MDPI journal article supplement (https://www.mdpi.com/2673-9410/4/1/10)
Supplement: s1 [file s1]

Supplementary material to article:

# Qualitative model of the causal interactions between phytoplankton, zooplankton, and environmental factors in the Romanian Black Sea.

Elena Bişnicu<sup>1\*</sup>, Laura Boicenco<sup>2</sup>, Elena Pantea<sup>1</sup>, Florin Timofte<sup>2</sup>, Luminița Lazăr<sup>3\*</sup> and Oana Vlas<sup>1\*</sup>

<sup>1</sup> Ecology and Marine Biology Department, National Institute for Marine Research and Development “Grigore Antipa”, 300 Mamaia Blvd., 900581 Constanta, Romania; [ebisnicu@alpha.rmri.ro](mailto:ebisnicu@alpha.rmri.ro) (E.B.); [ovlas@alpha.rmri.ro](mailto:ovlas@alpha.rmri.ro) (O.V.)

<sup>2</sup> National Institute for Marine Research and Development “Grigore Antipa”, 300 Mamaia Blvd., 900581 Constanta, Romania; [lboicenco@alpha.rmri.ro](mailto:lboicenco@alpha.rmri.ro) (L.B.); [ftimofte@alpha.rmri.ro](mailto:ftimofte@alpha.rmri.ro) (F.T.)

<sup>3</sup> Chemical Oceanography and Marine Pollution Department, National Institute for Marine Research and Development “Grigore Antipa”, 300 Mamaia Blvd., 900581 Constanta, Romania; [llazar@alpha.rmri.ro](mailto:llazar@alpha.rmri.ro) (L.L.)

\* Correspondence: [ebisnicu@alpha.rmri.ro](mailto:ebisnicu@alpha.rmri.ro) (E.B.), [llazar@alpha.rmri.ro](mailto:llazar@alpha.rmri.ro) (L.L.), [ovlas@alpha.rmri.ro](mailto:ovlas@alpha.rmri.ro) (O.V.)

**Table S1.** Sample size for each season and marine reporting unit

| Number of collected samples | Marine reporting units |            |            | Total      |
|-----------------------------|------------------------|------------|------------|------------|
|                             | Variable Salinity      | Coastal    | Marine     |            |
| Spring                      | 55                     | 80         | 105        | 240        |
| 2008                        | 5                      | 15         | 15         | 35         |
| 2009                        | 1                      |            |            | 1          |
| 2010                        | 16                     | 6          | 14         | 36         |
| 2012                        | 9                      | 20         | 15         | 44         |
| 2013                        | 9                      | 14         | 16         | 39         |
| 2014                        | 8                      | 16         | 20         | 44         |
| 2016                        | 4                      | 2          | 7          | 13         |
| 2017                        | 3                      | 7          | 18         | 28         |
| Summer                      | 43                     | 89         | 85         | 217        |
| 2008                        | 9                      | 22         | 6          | 37         |
| 2009                        | 8                      | 2          |            | 10         |
| 2010                        |                        | 9          | 2          | 11         |
| 2011                        | 12                     | 20         | 18         | 50         |
| 2013                        |                        | 9          | 5          | 14         |
| 2014                        |                        | 5          | 7          | 12         |
| 2015                        |                        | 1          | 4          | 5          |
| 2016                        | 2                      | 3          | 11         | 16         |
| 2017                        | 3                      | 4          | 16         | 23         |
| 2018                        | 9                      | 14         | 16         | 39         |
| <b>Total</b>                | <b>98</b>              | <b>169</b> | <b>190</b> | <b>457</b> |

**Table S2.** Descriptive statistics of physicochemical parameters and dissolved nutrients in Black Sea waters (2008-2018)

| Variable              | Valid N | Mean   | Median | Minimum | Maximum | Lower Quartile | Upper Quartile | Std.Dev. |
|-----------------------|---------|--------|--------|---------|---------|----------------|----------------|----------|
| T [°C]                | 1977    | 14.41  | 12.47  | 0.80    | 27.80   | 7.92           | 21.72          | 7.28     |
| S [‰]                 | 1973    | 15.90  | 16.78  | 0.11    | 24.22   | 14.74          | 18.13          | 3.30     |
| O <sub>2</sub> [μM]   | 1995    | 317.63 | 316.60 | 69.20   | 677.00  | 282.30         | 352.40         | 58.60    |
| O <sub>2</sub> [%]    | 1733    | 109.93 | 106.60 | 4.10    | 282.31  | 95.50          | 124.50         | 23.80    |
| PO <sub>4</sub> [μM]  | 2001    | 0.32   | 0.18   | 0.00    | 43.40   | 0.08           | 0.31           | 1.20     |
| SiO <sub>4</sub> [μM] | 1998    | 11.96  | 6.20   | 0.00    | 395.20  | 3.10           | 12.60          | 22.46    |
| NO <sub>2</sub> [μM]  | 1970    | 0.76   | 0.23   | 0.00    | 50.85   | 0.11           | 0.56           | 2.64     |
| NO <sub>3</sub> [μM]  | 1999    | 4.07   | 2.21   | -1.01   | 73.38   | 1.28           | 4.27           | 6.21     |
| NH <sub>4</sub> [μM]  | 1975    | 4.85   | 2.54   | 0.00    | 158.78  | 1.16           | 5.82           | 8.81     |

**Table S3.** Phytoplankton and zooplankton abundances and biomasses for each marine reporting unit and season

| Variable                                | All Groups, Descriptive Statistics |          |         |          |          |
|-----------------------------------------|------------------------------------|----------|---------|----------|----------|
|                                         | Valid N                            | Mean     | Minimum | Maximum  | Std.Dev. |
| ZPK Total Density [ind/m <sup>3</sup> ] | 457                                | 10743    | 68.771  | 194808   | 18639    |
| ZPK Total Biomass [mg/m <sup>3</sup> ]  | 457                                | 419      | 0.893   | 10103    | 801      |
| FPK Total Density [cells/L]             | 457                                | 1416013  | 3120    | 39740000 | 3391445  |
| FPK Total Biomass [mg/m <sup>3</sup> ]  | 457                                | 1109     | 0.92    | 12186    | 1481     |
| Season=Spring, MRU=Variable Salinity    |                                    |          |         |          |          |
| ZPK Total Density [ind/m <sup>3</sup> ] | 55                                 | 5329     | 68.77   | 54614    | 9998     |
| ZPK Total Biomass [mg/m <sup>3</sup> ]  | 55                                 | 97       | 0.89    | 909      | 159      |
| FPK Total Density [cells/L]             | 55                                 | 3348294  | 99200   | 16624220 | 3621219  |
| FPK Total Biomass [mg/m <sup>3</sup> ]  | 55                                 | 1340     | 69.51   | 7313     | 1312     |
| Season=Spring, MRU=Coastal              |                                    |          |         |          |          |
| ZPK Total Density [ind/m <sup>3</sup> ] | 80                                 | 7043     | 245.61  | 47678    | 8718     |
| ZPK Total Biomass [mg/m <sup>3</sup> ]  | 80                                 | 248      | 3.431   | 3888     | 509      |
| FPK Total Density [cells/L]             | 80                                 | 1812332  | 6720    | 27242200 | 4098981  |
| FPK Total Biomass [mg/m <sup>3</sup> ]  | 80                                 | 1055     | 0.92    | 8384     | 1396     |
| Season=Spring, MRU=Marine               |                                    |          |         |          |          |
| ZPK Total Density [ind/m <sup>3</sup> ] | 105                                | 4185     | 324.88  | 29161    | 5533     |
| ZPK Total Biomass [mg/m <sup>3</sup> ]  | 105                                | 207      | 4.857   | 2187     | 424      |
| FPK Total Density [cells/L]             | 105                                | 2214675  | 3120    | 39740000 | 5014953  |
| FPK Total Biomass [mg/m <sup>3</sup> ]  | 105                                | 1155     | 5.56    | 12186    | 1707     |
| Season=Summer, MRU=Variable Salinity    |                                    |          |         |          |          |
| ZPK Total Density [ind/m <sup>3</sup> ] | 43                                 | 21059.3  | 545.25  | 124583   | 24578    |
| ZPK Total Biomass [mg/m <sup>3</sup> ]  | 43                                 | 711.5    | 25.95   | 3180     | 870      |
| FPK Total Density [cells/L]             | 43                                 | 939905.1 | 28400   | 5336800  | 1101273  |
| FPK Total Biomass [mg/m <sup>3</sup> ]  | 43                                 | 2256.2   | 150.89  | 9747     | 2504     |
| Season=Summer, MRU=Coastal              |                                    |          |         |          |          |
| ZPK Total Density [ind/m <sup>3</sup> ] | 89                                 | 22039.1  | 874.34  | 194808   | 31704    |

|                                         |    |          |        |         |          |
|-----------------------------------------|----|----------|--------|---------|----------|
| ZPK Total Biomass [mg/m <sup>3</sup> ]  | 89 | 816      | 16.57  | 10103   | 1353.2   |
| FPK Total Density [cells/L]             | 89 | 304085.8 | 25460  | 1614960 | 328248.3 |
| FPK Total Biomass [mg/m <sup>3</sup> ]  | 89 | 887.8    | 136.56 | 3031    | 593.5    |
| Season=Summer, MRU=Marine               |    |          |        |         |          |
| ZPK Total Density [ind/m <sup>3</sup> ] | 85 | 8784     | 132.31 | 49373   | 8811.7   |
| ZPK Total Biomass [mg/m <sup>3</sup> ]  | 85 | 484.3    | 40.153 | 3037    | 578      |
| FPK Total Density [cells/L]             | 85 | 211230.6 | 7540   | 1433200 | 252807.1 |
| FPK Total Biomass [mg/m <sup>3</sup> ]  | 85 | 603.2    | 2.35   | 6609    | 913.4    |

**Table S4.** One-way ANOVA for Biological parameters grouped by MRU (calculated with STATISTICA)

| Variable                                | Analysis of Variance (ANOVA) Marked effects are significant at p < .05000 |              |              |             |             |             |          |          |
|-----------------------------------------|---------------------------------------------------------------------------|--------------|--------------|-------------|-------------|-------------|----------|----------|
|                                         | SS<br>Effect                                                              | df<br>Effect | MS<br>Effect | SS<br>Error | df<br>Error | MS<br>Error | F        | p        |
| ZPK Total Density [ind/m <sup>3</sup> ] | 7.04E+09                                                                  | 2            | 3.52E+09     | 1.51E+11    | 454         | 3.33E+08    | 10.56079 | 0.000033 |
| ZPK Total Biomass [mg/m <sup>3</sup> ]  | 4.51E+06                                                                  | 2            | 2.25E+06     | 2.88E+08    | 454         | 6.34E+05    | 3.55501  | 0.029379 |
| FPK Total Density [cells/L]             | 1.04E+14                                                                  | 2            | 5.18E+13     | 5.14E+15    | 454         | 1.13E+13    | 4.5787   | 0.010747 |
| FPK Total Biomass [mg/m <sup>3</sup> ]  | 5.03E+07                                                                  | 2            | 2.52E+07     | 9.50E+08    | 454         | 2.09E+06    | 12.02381 | 0.000008 |

**ZPK Total Density [ind/m<sup>3</sup>]:** The F-statistic is 10.56, and the p-value is 0.000033. Since the p-value is less than 0.05, we reject the null hypothesis. There are significant differences in total density among MRUs.

**ZPK Total Biomass [mg/m<sup>3</sup>]:** The F-statistic is 3.56, and the p-value is 0.029379. Again, the p-value is less than 0.05, indicating significant differences in total biomass among MRUs.

**FPK Total Density [cells/L]:** The F-statistic is 4.58, and the p-value is 0.010747. Once more, the p-value is less than 0.05, suggesting significant differences in total density.

**FPK Total Biomass [mg/m<sup>3</sup>]:** The F-statistic is 12.02, and the p-value is 0.000008. The p-value is well below 0.05, indicating significant differences in total biomass.

In summary, the ANOVA results show that the biological parameters (density and biomass for phytoplankton and zooplankton) significantly vary among different MRUs.

**Table S5.** Corellations between biological and environmental parameters in FCM, waters with variable salinity

[illegible]

**Table S6.** Corellations between biological and environmental parameters in FCM, coastal waters

[illegible]

**Table S7.** Corellations between biological and environmental parameters in FCM, marine shelf waters

|                                             | Variable | T [°C] | S [‰] | PO <sub>4</sub><br>[μM] | SiO <sub>4</sub><br>[μM] | NO <sub>3</sub><br>[μM] | NO <sub>2</sub><br>[μM] | NH <sub>4</sub><br>[μM] | Bacillariophyceae<br>(cells/L) | Chlorophyceae<br>(cells/L) | Chrysophyceae<br>(cells/L) | Dinoflagellata incertae sedis<br>(cells/L) | Cryptophyceae<br>(cells/L) | Dictyochophyceae<br>(cells/L) | Dinophyceae<br>(cells/L) | Euglenoidae<br>(cells/L) | Prasinophyceae<br>(cells/L) | Prymnesiophyceae<br>(cells/L) | Trebouxiophyceae<br>(cells/L) | Ulvothyceae<br>(cells/L) | Cladocera<br>(ind/m3) | Meroplankton<br>(ind/m3) | Cyanophyceae<br>(cells/L) | Copepoda<br>(ind/m3) | Ebriophyceae<br>(cells/L) | Chlorodendrophyceae<br>(cells/L) | Conjugatophyceae<br>(cells/L) | Fusulinata<br>(cells/L) |  |
|---------------------------------------------|----------|--------|-------|-------------------------|--------------------------|-------------------------|-------------------------|-------------------------|--------------------------------|----------------------------|----------------------------|--------------------------------------------|----------------------------|-------------------------------|--------------------------|--------------------------|-----------------------------|-------------------------------|-------------------------------|--------------------------|-----------------------|--------------------------|---------------------------|----------------------|---------------------------|----------------------------------|-------------------------------|-------------------------|--|
| T [°C]                                      |          |        |       |                         |                          |                         |                         |                         | -0.17                          |                            | -0.17                      |                                            |                            |                               |                          |                          |                             |                               |                               |                          |                       |                          |                           |                      |                           |                                  |                               |                         |  |
| S [‰]                                       |          |        |       |                         |                          |                         |                         |                         | 0.32                           | 0.35                       |                            | 0.19                                       |                            |                               |                          |                          |                             |                               |                               |                          |                       |                          |                           |                      |                           |                                  |                               |                         |  |
| PO <sub>4</sub> [μM]                        |          |        |       |                         |                          |                         |                         |                         | 0.32                           | 0.2                        |                            |                                            |                            |                               |                          |                          |                             |                               |                               |                          |                       |                          |                           |                      |                           |                                  |                               |                         |  |
| SiO <sub>4</sub> [μM]                       |          |        |       |                         |                          |                         |                         |                         |                                |                            |                            |                                            |                            |                               |                          |                          |                             |                               |                               |                          |                       |                          |                           |                      |                           |                                  |                               |                         |  |
| NO <sub>3</sub> [μM]                        |          |        |       |                         |                          |                         |                         |                         |                                |                            |                            |                                            |                            |                               | 0.23                     |                          |                             |                               |                               |                          |                       |                          |                           |                      |                           |                                  |                               |                         |  |
| NO <sub>2</sub> [μM]                        |          |        |       |                         |                          |                         |                         |                         |                                |                            |                            |                                            |                            |                               | 0.26                     |                          |                             |                               |                               |                          |                       |                          |                           |                      | 0                         |                                  |                               |                         |  |
| NH <sub>4</sub> [μM]                        |          |        |       |                         |                          |                         |                         |                         |                                |                            |                            |                                            |                            |                               | 0.39                     |                          |                             |                               |                               |                          |                       |                          |                           |                      |                           | 0.24                             |                               |                         |  |
| Bacillariophyceae (cells/L)                 |          |        |       |                         |                          |                         |                         |                         |                                |                            |                            |                                            |                            |                               | 0.4                      |                          |                             |                               |                               |                          |                       |                          |                           |                      |                           | -0.23                            |                               |                         |  |
| Chlorophyceae (cells/L)                     |          |        |       |                         |                          |                         |                         |                         |                                |                            |                            |                                            |                            |                               |                          |                          |                             |                               |                               |                          |                       |                          |                           |                      |                           |                                  |                               |                         |  |
| Chrysophyceae (cells/L)                     |          |        |       |                         |                          |                         |                         |                         |                                |                            |                            |                                            |                            |                               |                          |                          |                             |                               |                               |                          |                       |                          |                           |                      |                           |                                  |                               |                         |  |
| Dinoflagellata incertae sedis (cells/L)     |          |        |       |                         |                          |                         |                         |                         |                                |                            |                            |                                            |                            |                               |                          |                          |                             |                               |                               |                          |                       |                          |                           |                      |                           |                                  |                               |                         |  |
| Cryptophyceae (cells/L)                     |          |        |       |                         |                          |                         |                         |                         |                                |                            |                            |                                            |                            |                               |                          |                          |                             |                               |                               |                          |                       |                          |                           |                      |                           |                                  |                               |                         |  |
| Dictyochophyceae (cells/L)                  |          |        |       |                         |                          |                         |                         |                         |                                |                            |                            |                                            |                            |                               |                          |                          |                             |                               |                               |                          |                       |                          |                           |                      |                           |                                  |                               |                         |  |
| Dinophyceae (cells/L)                       |          |        |       |                         |                          |                         |                         |                         |                                |                            |                            |                                            |                            |                               |                          |                          |                             |                               |                               |                          |                       |                          |                           |                      |                           |                                  |                               |                         |  |
| Euglenoidae (cells/L)                       |          |        |       |                         |                          |                         |                         |                         |                                |                            |                            |                                            |                            |                               |                          |                          |                             |                               |                               |                          |                       |                          |                           |                      |                           |                                  |                               |                         |  |
| Prasinophyceae (cells/L)                    |          |        |       |                         |                          |                         |                         |                         |                                |                            |                            |                                            |                            |                               |                          |                          |                             |                               |                               |                          |                       |                          |                           |                      |                           |                                  |                               |                         |  |
| Prymnesiophyceae (cells/L)                  |          |        |       |                         |                          |                         |                         |                         |                                |                            |                            |                                            |                            |                               |                          |                          |                             |                               |                               |                          |                       |                          |                           |                      |                           |                                  |                               |                         |  |
| Trebouxiophyceae (cells/L)                  |          |        |       |                         |                          |                         |                         |                         |                                |                            |                            |                                            |                            |                               |                          |                          |                             |                               |                               |                          |                       |                          |                           |                      |                           |                                  |                               |                         |  |
| Ulvothyceae (cells/L)                       |          |        |       |                         |                          |                         |                         |                         |                                |                            |                            |                                            |                            |                               |                          |                          |                             |                               |                               |                          |                       |                          |                           |                      |                           |                                  |                               |                         |  |
| Cladocera (ind/m3)                          |          |        |       |                         |                          |                         |                         |                         |                                |                            |                            |                                            |                            |                               |                          |                          |                             |                               |                               |                          |                       |                          |                           |                      |                           |                                  |                               |                         |  |
| Meroplankton (ind/m3)                       |          |        |       |                         |                          |                         |                         |                         |                                |                            |                            |                                            |                            |                               |                          |                          |                             |                               |                               |                          |                       |                          |                           |                      |                           |                                  |                               |                         |  |
| Cyanophyceae (cells/L)                      |          |        |       |                         |                          |                         |                         |                         |                                |                            |                            |                                            |                            |                               |                          |                          |                             |                               |                               |                          |                       |                          |                           |                      |                           |                                  |                               |                         |  |
| Copepoda (ind/m3)                           |          |        |       |                         |                          |                         |                         |                         |                                |                            |                            |                                            |                            |                               |                          |                          |                             |                               |                               |                          |                       |                          |                           |                      |                           |                                  |                               |                         |  |
| Ebriophyceae (cells/L)                      |          |        |       |                         |                          |                         |                         |                         |                                |                            |                            |                                            |                            |                               |                          |                          |                             |                               |                               |                          |                       |                          |                           |                      |                           |                                  |                               |                         |  |
| Chlorodendrophyceae (cells/L)               |          |        |       |                         |                          |                         |                         |                         |                                |                            |                            |                                            |                            |                               |                          |                          |                             |                               |                               |                          |                       |                          |                           |                      |                           |                                  |                               |                         |  |
| Conjugatophyceae (cells/L)                  |          |        |       |                         |                          |                         |                         |                         |                                |                            |                            |                                            |                            |                               |                          |                          |                             |                               |                               |                          |                       |                          |                           |                      |                           |                                  |                               |                         |  |
| Fusulinata (cells/L)                        |          |        |       |                         |                          |                         |                         |                         |                                |                            |                            |                                            |                            |                               |                          |                          |                             |                               |                               |                          |                       |                          |                           |                      |                           |                                  |                               |                         |  |
| * empty cells = no significant correlations |          |        |       |                         |                          |                         |                         |                         |                                |                            |                            |                                            |                            |                               |                          |                          |                             |                               |                               |                          |                       |                          |                           |                      |                           |                                  |                               |                         |  |
